# Supplementary material for: Intrinsic ROS Drive Hair Follicle Cycle Progression by Modulating DNA Damage and Repair and Subsequently Hair Follicle Apoptosis and Macrophage Polarization
Source: PubMed Central journal article supplement (PMC9315455; doi:10.1155/2022/8279269), 2022-07-14
Supplement: 8279269.f1.pdf [file 8279269.f1.pdf]

**Table S1**

Primary antibodies used for Western blot.

| Antibodies        | Dilution | Brand       | Country |
|-------------------|----------|-------------|---------|
| $\gamma$ H2AX     | 1:1000   | Abcam       | US      |
| OGG1              | 1:1000   | Gene Tex    | US      |
| PARP 1            | 1:1000   | Santa Cruz  | US      |
| PAR               | 1:1000   | CST         | US      |
| p-ATM             | 1:1000   | Merck       | Germany |
| KU70              | 1:1000   | Gene Tex    | US      |
| KU80              | 1:2000   | Abcam       | US      |
| p-BRCA 1          | 1:1000   | Abcam       | US      |
| Rad 51            | 1:1000   | Gene Tex    | US      |
| AIF 67            | 1:1000   | CST         | US      |
| AIF 57            | 1:500    | Santa Cruz  | US      |
| Cleaved-Caspase 3 | 1:1000   | CST         | US      |
| Cytochrome c      | 1:1000   | CST         | US      |
| COX IV            | 1:1000   | CST         | US      |
| HIF-1 $\alpha$    | 1:1000   | CST         | US      |
| p-NF-KB           | 1:500    | ABclonal    | China   |
| CCL2              | 1:500    | ABclonal    | China   |
| Histone 3.1       | 1:5000   | Sanjian     | China   |
| $\beta$ -actin    | 1:5000   | Sanjian     | China   |
| GAPDH             | 1:10000  | Proteintech | China   |
