# Supplementary material for: Intrinsic ROS Drive Hair Follicle Cycle Progression by Modulating DNA Damage and Repair and Subsequently Hair Follicle Apoptosis and Macrophage Polarization
Source: PubMed Central journal article supplement (PMC9315455; doi:10.1155/2022/8279269), 2022-07-14
Supplement: 8279269.f2.pdf [file 8279269.f2.pdf]

**Table S2**

Antibodies used for Immunohistochemistry and Immunofluorescence

| Antibodies                                     | Dilution | Brand      |
|------------------------------------------------|----------|------------|
| KU 70                                          | 1:100    | Gene Tex   |
| OGG1                                           | 1:100    | Gene Tex   |
| cleaved Caspase 3                              | 1:200    | CST        |
| F 4/80                                         | 1:100    | CST        |
| CD 86                                          | 1:300    | CST        |
| CD 206                                         | 1:20000  | Abcam      |
| p-NF- $\kappa$ B                               | 1:200    | ABclonal   |
| CCL 2                                          | 1:200    | ABclonal   |
| AIF 57                                         | 1:50     | Santa Cruz |
| Ki 67                                          | 1:200    | Abcam      |
| $\gamma$ H2AX                                  | 1:50     | Abcam      |
| 8-OH-dG                                        | 1:100    | Abcam      |
| Anti-rabbit IgG (Alexa<br>Fluor 594 conjugate) | 1:1000   | CST        |
| Anti-rabbit IgG (Alexa<br>Fluor 488 Conjugate) | 1:1000   | CST        |
| Anti-mouse IgG (Alexa<br>Fluor 594 conjugate)  | 1:1000   | CST        |
| Anti-mouse IgG (Alexa<br>Fluor 488 Conjugate)  | 1:1000   | CST        |
| Anti-rat IgG (Alexa Fluor<br>555 Conjugate)    | 1:1000   | CST        |
